# Supplementary material for: Design and synthesis of interconnected hierarchically porous anatase titanium dioxide nanofibers as high-rate and long-cycle-life anodes for lithium-ion batteries
Source: Royal Society of Chemistry journal article supplement (doi:10.1039/c8nr01666f), 2018-01-01
Supplement: c8nr01666f1.pdf [file c8nr01666f1.pdf]

## Supporting Information

### **Design and synthesis of interconnected hierarchically porous anatase titanium dioxide nanofibers as high-rate and long-cycle-life anodes for lithium-ion batteries**

Min Su Jo<sup>1†</sup>, Gi Dae Park<sup>2†</sup>, Yun Chan Kang<sup>2,\*</sup>, and Jung Sang Cho<sup>1,\*</sup>

<sup>1</sup>*Department of Engineering Chemistry, Chungbuk National University, Chungbuk 361-763, Republic of Korea, E-mail: [jscho@cbnu.ac.kr](mailto:jscho@cbnu.ac.kr), Fax: (+82) 43-262-2380*

<sup>2</sup>*Department of Materials Science and Engineering, Korea University, Anam-Dong, Seongbuk-Gu Seoul 136-713, Republic of Korea, E-mail: [yckang@korea.ac.kr](mailto:yckang@korea.ac.kr), Fax : (+82) 2-928-3584*

<sup>†</sup>These authors contributed equally to this work.

**KEYWORDS:** TiO<sub>2</sub>, Anatase, Lithium-ion batteries, Porous structures, Nanofibers, Anodes

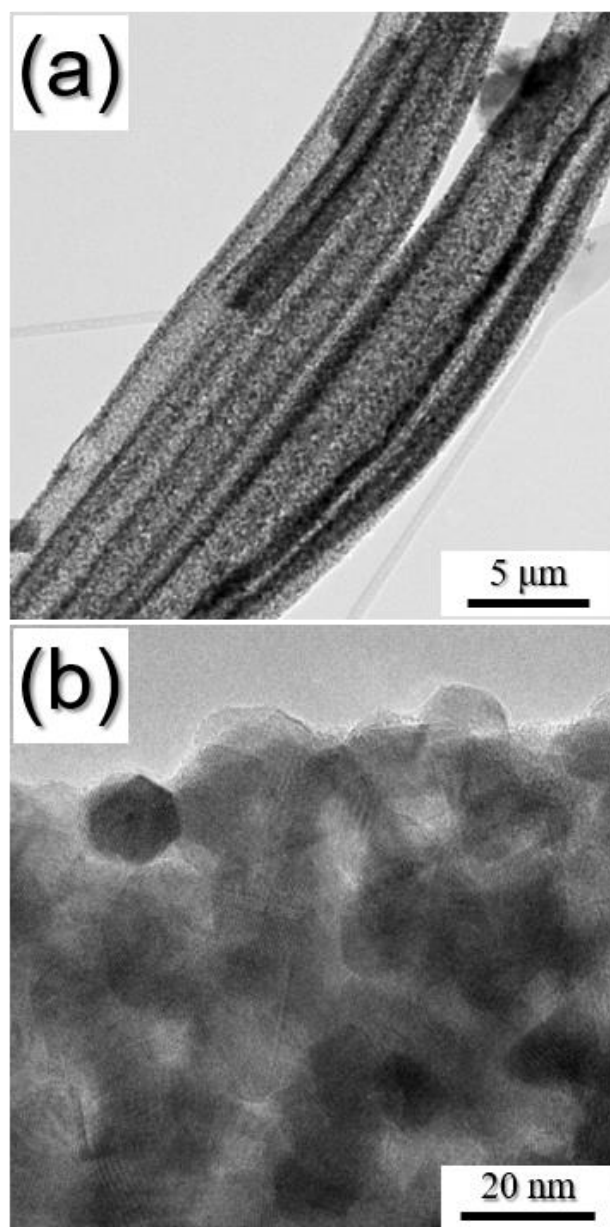

**Fig. S1.** (a, b) HR-TEM images of the TiO<sub>2</sub> nanofiber with tube-like structure.

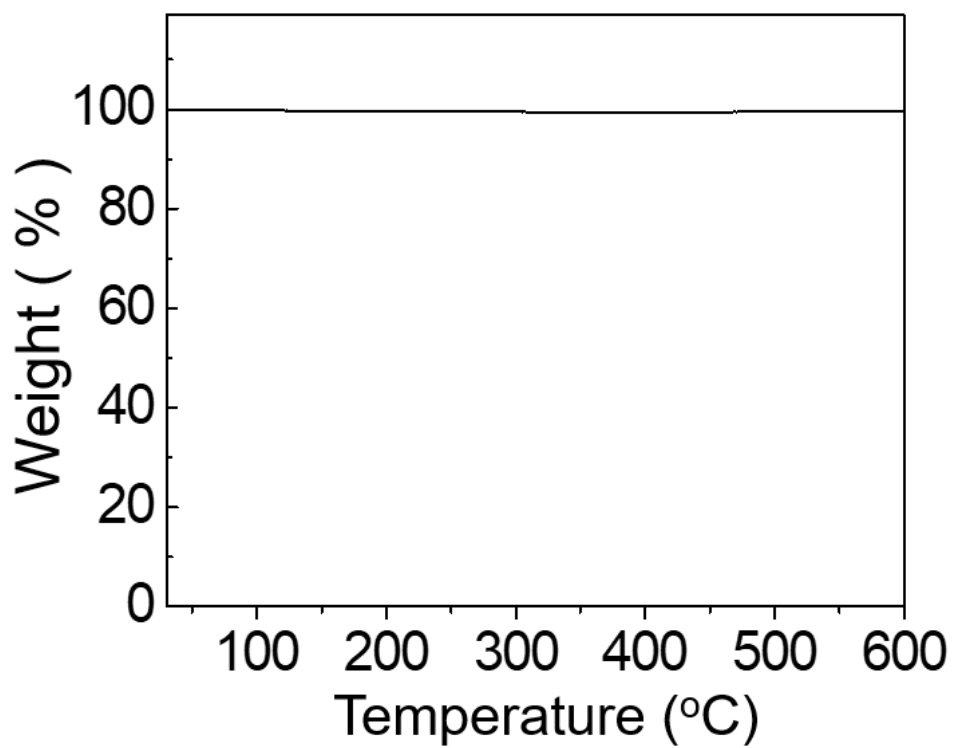

**Fig. S2.** TGA curve of IHP-A-TiO<sub>2</sub> nanofibers obtained after heat-treatment of PS dispersed PAN/TBT composited nanofibers at 500 °C.

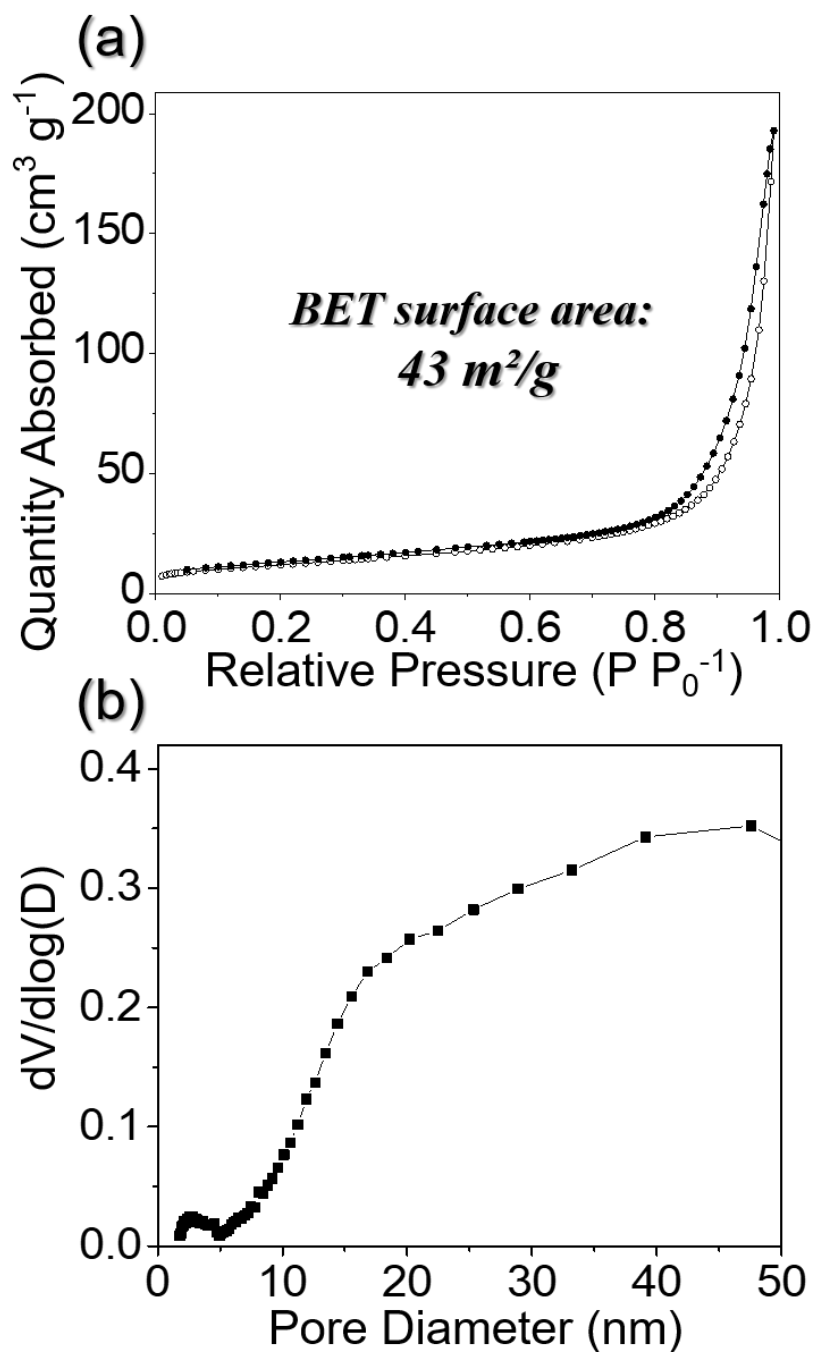

**Fig. S3.** (a)  $\text{N}_2$  adsorption and desorption isotherms and (b) BJH pore size distributions of IHP-A- $\text{TiO}_2$  nanofibers.

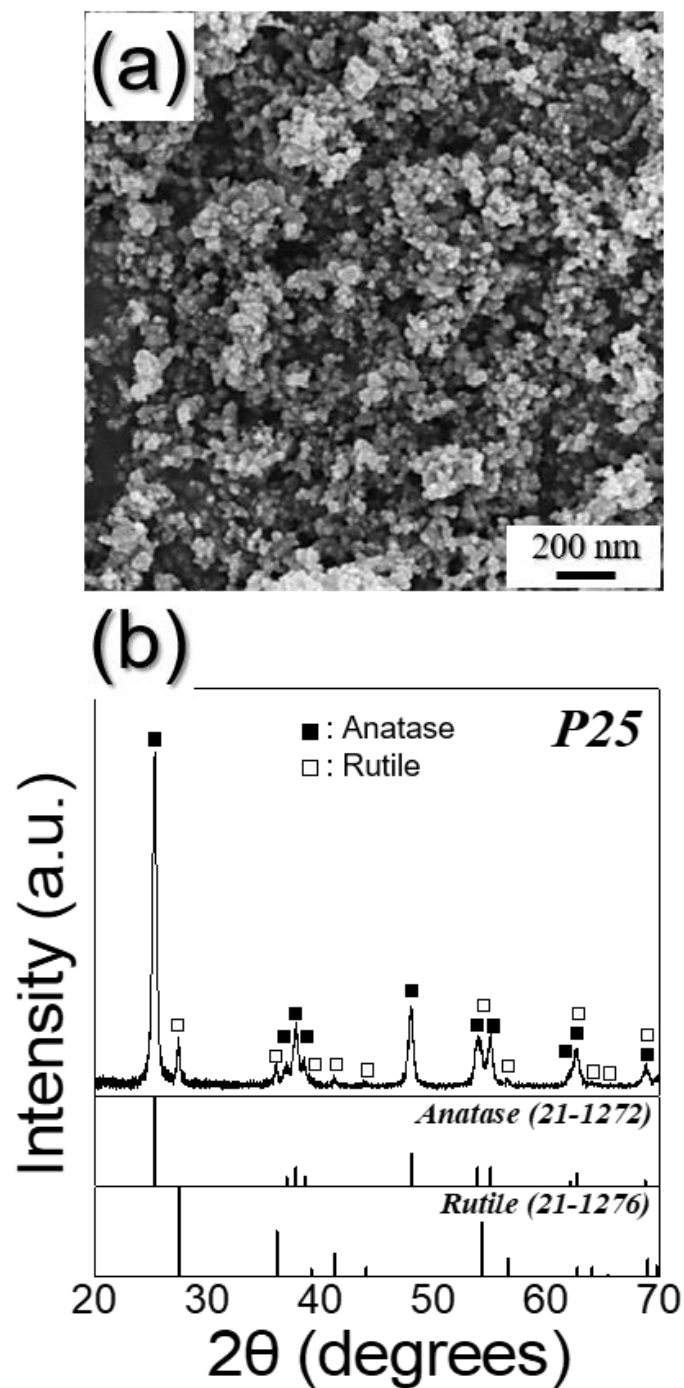

**Fig. S4.** (a) FE-SEM image and (b) XRD pattern of the commercial TiO<sub>2</sub> nanopowders (P25).

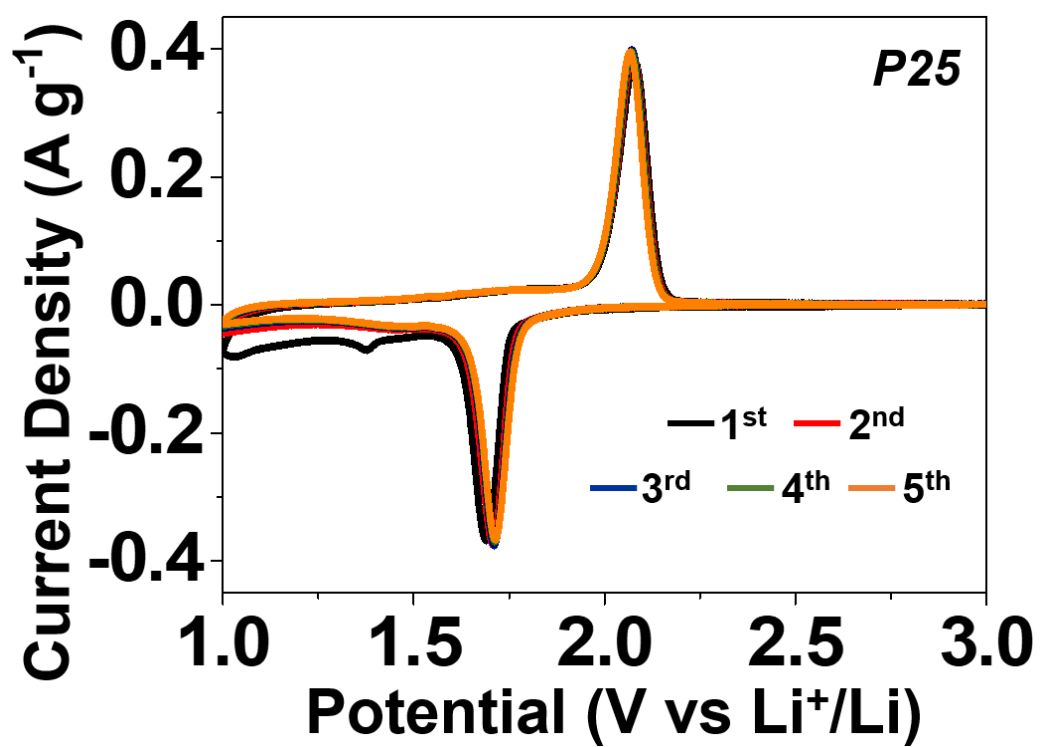

Fig. S5. CV curves of the commercial TiO<sub>2</sub> nanopowders (P25).

**Table S1.** Comparison of the electrochemical performances of various TiO<sub>2</sub> anatase structures for lithium-ion batteries.

| Materials                                                    | Voltage range (V) | Current rate            | Initial C <sub>dis</sub> /C <sub>cha</sub> [mA h g <sup>-1</sup> ] | Discharge capacity [mA h g <sup>-1</sup> ] | Cycle number | Ref          |
|--------------------------------------------------------------|-------------------|-------------------------|--------------------------------------------------------------------|--------------------------------------------|--------------|--------------|
| IHP-A-TiO <sub>2</sub> nanofibers                            | 1-3               | 1000 mA g <sup>-1</sup> | 178/143                                                            | 142                                        | <b>3000</b>  | In this work |
| TiO <sub>2</sub> nanofibers with fiber-in-tube               | 1-3               | 200 mA g <sup>-1</sup>  | 231/170                                                            | 177                                        | 1000         | [29]         |
| Mesoporous anatase with an rrdred 3D pore structure          | 1-3               | 1500 mA g <sup>-1</sup> | -                                                                  | ~140                                       | 500          | [S1]         |
| Porous anatase TiO <sub>2</sub>                              | 1-3               | 840 mA g <sup>-1</sup>  | -                                                                  | 106.5                                      | 500          | [53]         |
| Hierarchical porous anatase TiO <sub>2</sub>                 | 1-3               | 840 mA g <sup>-1</sup>  | -                                                                  | ~145                                       | 200          | [S2]         |
| Hierarchically structured porous TiO <sub>2</sub> spheres    | 1-3               | 178 mA g <sup>-1</sup>  | 187/-                                                              | 178                                        | 100          | [63]         |
| TiO <sub>2</sub> mesoporous microspheres                     | 1-3               | 204 mA g <sup>-1</sup>  | 156/-                                                              | 150                                        | 50           | [S3]         |
| Mesoporous anataseTiO <sub>2</sub>                           | 1-3               | 1680 mA g <sup>-1</sup> | 126/123                                                            | 122                                        | 1100         | [S4]         |
| Hierarchical anatase TiO <sub>2</sub> film                   | 1-3               | 1680 mA g <sup>-1</sup> | -                                                                  | ~120                                       | 400          | [S5]         |
| Hierarchical anatase TiO <sub>2</sub> spheres                | 1-3               | 850 mA g <sup>-1</sup>  | -                                                                  | 130                                        | 200          | [S6]         |
| Ultrathin Anatase TiO <sub>2</sub> Nanosheets                | 1-3               | 850 mA g <sup>-1</sup>  | 204/169                                                            | 136                                        | 100          | [S7]         |
| Anatase TiO <sub>2</sub> hollow nanofibers.                  | 1-3               | 100 mA g <sup>-1</sup>  | 184/150                                                            | ~130                                       | 300          | [S8]         |
| Anatase TiO <sub>2</sub> nanosheet                           | 1-3               | 1675 mA g <sup>-1</sup> | -                                                                  | 120.2                                      | 200          | [S9]         |
| Petal-likeTiO <sub>2</sub> nanosheets                        | 1-3               | 400 mA g <sup>-1</sup>  | 194/-                                                              | ~180                                       | 50           | [S10]        |
| Porous anatase TiO <sub>2</sub> nanorods                     | 1-3               | 120 mA g <sup>-1</sup>  | -                                                                  | 150                                        | 30           | [S11]        |
| multishelled TiO <sub>2</sub> hollow microspheres            | 1-3               | 1675 mA g <sup>-1</sup> | -                                                                  | 119                                        | 1200         | [S12]        |
| Anatase TiO <sub>2</sub> nanowires                           | 1-3               | 200 mA g <sup>-1</sup>  | 198/-                                                              | ~158                                       | 20           | [S13]        |
| Porous anatase TiO <sub>2</sub> single crystal architectures | 1-3               | 200 mA g <sup>-1</sup>  | 156.1/155.8                                                        | 114                                        | 100          | [S14]        |

[S1] Y. Ren, L. J. Hardwick and P. G. Bruce, *Angew. Chem.*, 2010, **122**, 2624-2628.

[S2] Z. Xiu, M. H. Alfaruqi, J. Gim, J. Song, S. Kim, T. V. Thi, P. T. Duong, J. P. Baboo, V. Mathew and J. Kim, *Chem. Commun.*, 2015, **51**, 12274-12277.

- [S3] J. Wang, Y. Zhou, Y. Hu, R. O'Hayre and Z. Shao, *J. Phys. Chem. C*, 2011, **115**, 2529-2536.
- [S4] Z. Xiu, M. H. Alfaruqi, J. Gim, J. Song, S. Kim, P. T. Duong, J. P. Baboo, V. Mathew and J. Kim, *J. Alloy. Compd.*, 2016, **674**, 174-178.
- [S5] B. Zhao and Z. Shao, *J. Phys. Chem. C*, 2012, **116**, 17440-17447.
- [S6] H. B. Wu, X. W. D. Lou and H. H. Hng, *Chem. – Eur. J.*, 2012, **18**, 2094-2099.
- [S7] J. S. Chen, Y. L. Tan, C. M. Li, Y. L. Cheah, D. Luan, S. Madhavi, F. Y. C. Boey, L. A. Archer and X. W. Lou, *J. Am. Chem. Soc.*, 2010, **132**, 6124-6130.
- [S8] X. Zhang, V. Aravindan, P. S. Kumar, H. Liu, J. Sundaramurthy, S. Ramakrishna and S. Madhavi, *Nanoscale*, 2013, **5**, 5973-5980.
- [S9] J. S. Chen and X. W. Lou, *Electrochem. Commun.*, 2009, **11**, 2332-2335.
- [S10] F. Wu, Z. Wang, X. Li and H. Guo, *Ceram. Int.*, 2014, **40**, 16805-16810.
- [S11] S.-J. Bao, Q.-L. Bao, C.-M. Li and Z.-L. Dong, *Electrochem. Commun.*, 2007, **9**, 1233-1238.
- [S12] H. Ren, R. Yu, J. Wang, Q. Jin, M. Yang, D. Mao, D. Kisailus, H. Zhao and D. Wang, *Nano Lett.*, 2014, **14**, 6679-6684.
- [S13] F. Wu, X. Li, Z. Wang, H. Guo, L. Wu, X. Xiong and X. Wang, *J. Alloy. Compd.*, 2011, **509**, 3711-3715.
- [S14] D. Zhang, M. Wen, P. Zhang, J. Zhu, G. Li and H. Li, *Langmuir*, 2012, **28**, 4543-4547.
